# Supplementary material for: Ketogenesis mitigates metabolic dysfunction–associated steatotic liver disease through mechanisms that extend beyond fat oxidation
Source: J Clin Invest. 2025 Apr 24;135(12):e191021. doi: 10.1172/JCI191021 (PMC12165805; doi:10.1172/JCI191021)
Supplement: Supplemental tables 1-2 [file jci-135-191021-s036.xlsx]

## Sheet: Supplemental Table 1
Supplementary Table 1: Inclusion and Exclusion Criteria for Human MASLD-MASH Subjects
1.1 Inclusion Criteria:
1. Age 30 to 67 years at eligibility visit
2. At least one of the following:
a) Diagnosed with NASH with a total NAS ≥ 4 including a ballooning score of at least 1, or non-NASH/NAFLD with a total NAS <3
b) Diagnosed with T2DM or prediabetes, HbA1c< 8% and NOT requiring insulin or other oral/injectable hypoglycemic agents
3. Body Mass Index (BMI) 30.0-45.0 kg/m2 at eligibility visit
4. Willingness to accept surgical intervention after an individual seminar session
5. All patients must have insurance with no exclusion for obesity related treatments or management of obesity surgery complications. This applies to all patients enrolled in the study
6. Expect to live or work within approximately one-hour traveling time from the study clinic for the duration of the one-year trial
7. Willingness to comply with the follow-up protocol and successful completion of the run-in (described in section 5.2)
8. Written informed consent
9. Suitable for liver biopsy using the percutaneous approach
10. Vulnerable populations will not be targeted for inclusion, but those noted in section 9.1 may be allowed to participate provided they met all of the inclusion and none of the exclusion criteria.
1.1 Exclusion Criteria:
1. Cardiovascular event (myocardial infarction, acute coronary syndrome, coronary artery angioplasty or bypass, stroke) in the past six months.
2. Current evidence of congestive heart failure, angina pectoris, or symptomatic peripheral vascular disease.
3. Cardiac stress test indicating that surgery or IMM would not be safe.
4. Pulmonary embolus or thrombophlebitis in the past six months.
5. Cancer of any kind (except basal cell skin cancer or cancer in situ) unless documented to be disease-free for five years.
6. Significant anemia (hemoglobin 1.0 g/dL or more below normal range) or history of coagulopathy.
7. Serum creatinine >1.5 mg/dL.
8. Serum total bilirubin greater than the upper limit of normal in the absence of Gilbert's syndrome, or alkaline phosphatase or ALT or AST greater than 2.5 the upper limit of normal. Elevated INR.
9. Alcohol intake more than one drink or >20 grams per day
10. History of stomach surgery, bile duct surgery, pancreatic surgery, splenectomy, or colon resection.
11. Gastric or duodenal ulcer in the past six months.
12. History of intra-abdominal sepsis (except for uncomplicated appendicitis or diverticulitis more than six months prior to enrollment).
13. Previous organ transplantation.
14. Self-reported HIV-positive status, active tuberculosis, active malaria, chronic hepatitis B or C, cirrhosis, or inflammatory bowel disease.
15. Currently pregnant or nursing, or planning to become pregnant in the next two years.
16. History of alcohol, drug, or opioid dependency (excluding nicotine) in the past five years.
17. Active psychosocial or psychiatric problem that is likely to interfere with adherence to the protocol.
18. Depression A CESD score more than 17 and a psychologist determination that the patient is not a good fit for surgery.
19. Current participation in a conflicting research protocol.
20. Presence of any chronic or debilitating disease that would make adherence to the protocol difficult.
21. 12-lead EKG indicating that surgery would not be safe.
22. Serum c-peptide <1.0 ng/ml post prandial.
23. Exclusions may also be made at the discretion of the attending physician or the eligibility committee.
24. Contraindication to MRI scanning. MRI contraindications are assessed by MR technologists on the day of scanning using a standard safety screening form.
25. Gastroesophageal reflux disease requiring medications. History of endoscopy demonstrating esophagitis or Barretts changes in the esophagus. Any history of dysphagia.
26. More than 2 cups of coffee per day.
27. Treatment with drugs associated with nonalcoholic fatty liver disease (amiodarone, methotrexate, oral glucocorticoids at doses greater than 5 mg/day, tamoxifen, estrogens at doses greater than those used for hormone replacement or contraception, anabolic steroids, valproic acid) for more than 4 weeks within the last 2 months prior to the initial screening.
28. Treatment with pioglitazone or high-dose vitamin E (>400 IU/day) within the last 2 months prior to the initial screening.
29. Initiation of treatment with a glucagon-like peptide-1 (GLP-1) agonist or a dose change within the last 2 months prior to the initial screening

## Sheet: Supplemental Table 2
Supplementary Table 2: RT-qPCR Primer Sequences
Sequences of primers for RT-qPCR analysis of mRNA transcript abundance, given in the 5` to 3` direction.
		RT-qPCR Primer Sequences
		Gene	Forward Primer Sequence (5` --> 3`)	Reverse Primer Sequence (5` --> 3`)
		Col1a1	TGCTTCGTGTAAACTCCCTC	TTGTTCGTCTGTTTCCAGGG
		Col3a1	GAAGTCTCTGAAGCTGATGGG	TTGCCTTGCGTGTTTGATATT
		Col4a1	AGACCATTCAGATTCCGCAG	CGCTTCTAAACTCTTCCAGACAG
		Acta2	CCGCAAATGCTTCTAAGTCC	TTTGGGCAGGAATGATTTGG
		Nox2	AGAGCATCTCCAACTCAGAATCCG	ACACTGGTTTCCTGGTGAAAGAGC
		Emr1	CTTTGGCTATGGGCTTCCAGTC	GCAAGGAGGACAGAGTTTATCGTG
		Tnfa	TGGAGTCATTGCTCTGTGAAGGGA	GGGCTCTGAGGAGTAGACAATAAAGG
		Rpl32	CCTCTGGTGAAGCCCAAGATC	TCTGGGTTTCCGCCAGTTT
